# Supplementary material for: A technique for a nano-textured gapless microlens array using self-formation characteristics of anodic alumina
Source: Royal Society of Chemistry journal article supplement (doi:10.1039/c7nr07440a), 2018-01-01

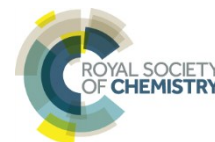

## Journal Name

### ARTICLE

## Supplemently data

### 1.Table

#### S-1. Process data of Fig. 4

|                             |                      |                                            |
|-----------------------------|----------------------|--------------------------------------------|
| 1 <sup>st</sup> Anodization | Material             | High purity Aluminum(99.999%)              |
|                             | Electrolyte          | 0.3M oxalic acid                           |
|                             | Temperature          | -3°C                                       |
|                             | Time                 | 20hr                                       |
|                             | Electrical condition | CC mode of 1mA/cm2                         |
| Etching process             | Electrolyte          | 1.8wt% chromic acid + 6wt% phosphoric acid |
|                             | Temperature          | 65°C                                       |
|                             | Time                 | 2hr                                        |
| 2 <sup>nd</sup> Anodization | Material             | High purity Aluminum(99.999%)              |
|                             | Electrolyte          | 0.3M oxalic acid                           |
|                             | Temperature          | -3°C                                       |
|                             | Time                 | 1hr, 4hr, 40hr                             |
|                             | Electrical condition | CC mode of 1mA/cm2                         |

S-2 Process data of Fig. 5

|                             |                      |                                            |               |  |
|-----------------------------|----------------------|--------------------------------------------|---------------|--|
| 1 <sup>st</sup> Anodization | Material             | High purity Aluminum(99.999%)              |               |  |
|                             | Electrolyte          | 0.3M oxalic acid                           |               |  |
|                             | Temperature          | -3°C                                       |               |  |
|                             | Time                 | 20min                                      |               |  |
|                             | Electrical condition | CC mode of 1mA/cm2                         |               |  |
| Etching process             | Electrolyte          | 1.8wt% chromic acid + 6wt% phosphoric acid |               |  |
|                             | Temperature          | 65°C                                       |               |  |
|                             | Time                 | 2hr                                        |               |  |
| 2 <sup>nd</sup> Anodization | Material             | High purity Aluminum(99.999%)              |               |  |
|                             | Electrolyte          | 0.3M oxalic acid                           |               |  |
|                             | Temperature          | -3°C                                       |               |  |
|                             | Time                 | 90min                                      |               |  |
|                             | Electrical condition | CC mode of 1mA/cm2                         |               |  |
| Widening                    | Electrolyte          | 0.1M phosphoric acid                       |               |  |
|                             | Temperature          | 35c                                        |               |  |
|                             | Time                 | 30min                                      |               |  |
| Lithography                 | Material             | AZ4620(AZ electronic materials)            |               |  |
|                             | Pattern size         | Pitch 30um, Diameter 15um                  |               |  |
|                             | spin coating speed   | 1 <sup>st</sup>                            | 500rpm - 5s   |  |
|                             |                      | 2 <sup>nd</sup>                            | 1300rpm - 60s |  |
|                             | Thickness            | 13um                                       |               |  |
| thermal carbonization       | Hard bake            | Temperature                                | 95°C          |  |
|                             |                      | Time                                       | 30min         |  |
|                             | Carbonization        | Temperature rise to 200°C                  |               |  |
| 3 <sup>rd</sup> Anodization | Material             | High purity Aluminum(99.999%)              |               |  |
|                             | Electrolyte          | 0.3M oxalic acid                           |               |  |
|                             | Temperature          | -3°C                                       |               |  |
|                             | Time                 | 17hr                                       |               |  |
|                             | Electrical condition | CC mode of 5mA/cm2                         |               |  |
| 4 <sup>th</sup> Anodization | Material             | High purity Aluminum(99.999%)              |               |  |
|                             | Electrolyte          | 0.3M oxalic acid                           |               |  |
|                             | Temperature          | -3°C                                       |               |  |
|                             | Time                 | 5hr, 10hr, 15hr                            |               |  |
|                             | Electrical condition | CV mode                                    |               |  |

## S-3 Process data of Fig. 6

|                             |                      |                                            |
|-----------------------------|----------------------|--------------------------------------------|
| 1 <sup>st</sup> Anodization | Material             | High purity Aluminum(99.999%)              |
|                             | Electrolyte          | 0.3M oxalic acid                           |
|                             | Temperature          | -3°C                                       |
|                             | Time                 | 10min                                      |
|                             | Electrical condition | CC mode of 1mA/cm <sup>2</sup>             |
| Etching process             | Electrolyte          | 1.8wt% chromic acid + 6wt% phosphoric acid |
|                             | Temperature          | 65°C                                       |
|                             | Time                 | 2hr                                        |
| 2 <sup>nd</sup> Anodization | Material             | High purity Aluminum(99.999%)              |
|                             | Electrolyte          | 0.3M oxalic acid                           |
|                             | Temperature          | -3°C                                       |
|                             | Time                 | 20hr                                       |
|                             | Electrical condition | CC mode of 1mA/cm <sup>2</sup>             |

## 2.Figure

## S-4. N-MLA surface contact angle

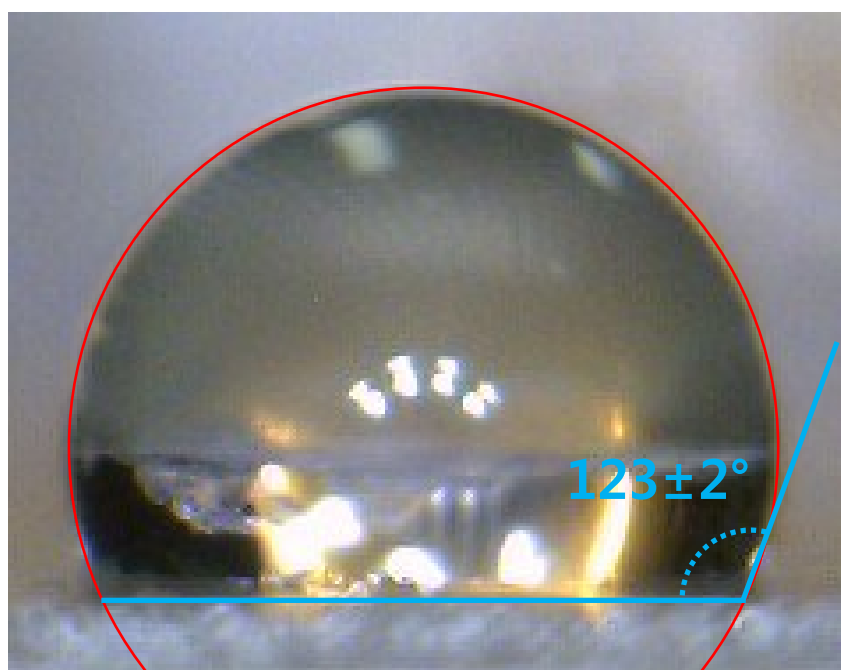

Supplement: c7nr07440a1.pdf [file c7nr07440a1.pdf]
